# Supplementary material for: Cryptotephra in the East Antarctic Mount Brown South ice core
Source: Copernicus journal article supplement (doi:10.5194/cp-2024-64), 2024-10-24
Supplement: Supplementary file 1 [file cp-2024-64-supplement.zip]

## Sheet: MBS-Alpha Glass
EPMA analyses of cryptotephra glass shards from the Mount Brown South ice core. Supplementary materials for Harlan, et al., 2024 (in prep).
	Oxide wt%, detection limit filtered (99% confidence - "b.d.l." indicates below detection limit) - not normalized															Oxide wt%, detection limit filtered (99% confidence - "b.d.l." indicates below detection limit) - normalized to Cl-adjusted total (following Iverson et al., 2017)														Iverson et al., 2017 Reference:
Sample	SiO2	TiO2	Al2O3	FeO	MnO	MgO	CaO	Na2O	K2O	P2O5	SO3	Cl	F	Analytical total		Sample	SiO2	TiO2	Al2O3	FeO	MnO	MgO	CaO	Na2O	K2O	P2O5	SO3	F		Nels A. Iverson, Donna Kalteyer, Nelia W. Dunbar, Andrei Kurbatov, Martin Yates,
7-6_002	38.1089	0.052219	11.5598	0.578372	b.d.l.	0.081575	2.84486	3.76277	0.395117	0.063968	0.169111	0.243124	b.d.l.	57.8477		7-6_002	66.156	0.0906507	20.0675	1.00404	b.d.l.	0.141612	4.9386	6.53206	0.685912	0.111047	0.293572	b.d.l.		Advancements and best practices for analysis and correlation of tephra and cryptotephra in ice,
7-6_013	46.7176	1.16713	10.6033	6.17385	b.d.l.	0.338252	1.83108	3.90319	0.704368	0.226667	0.065904	0.228472	0.086795	71.9585		7-6_013	65.1298	1.62711	14.7822	8.60706	b.d.l.	0.471563	2.55274	5.4415	0.981971	0.316	0.0918778	0.121002		Quaternary Geochronology,
7-6_014	56.1307	0.939775	18.5404	4.06147	0.214645	0.76813	1.27472	7.22782	5.22867	0.278168	0.177439	0.168878	0.363343	95.183		7-6_014	59.0761	0.989089	19.5133	4.27459	0.225908	0.808437	1.34161	7.6071	5.50304	0.292765	0.18675	0.382409		Volume 40,
7-7_006	46.2268	0.18168	7.85326	0.130707	b.d.l.	0.100356	0.562007	1.23214	3.59603	b.d.l.	0.056699	0.335087	b.d.l.	60.2429		7-7_006	77.1632	0.303266	13.1089	0.21818	b.d.l.	0.167517	0.938119	2.05673	6.0026	b.d.l.	0.0946437	b.d.l.		2017,
8.5_005	71.8609	0.117343	12.1564	0.386473	0.054792	0.068062	0.472577	3.68951	4.15917	b.d.l.	b.d.l.	0.114044	b.d.l.	93.0598		8.5_005	77.3149	0.126249	13.079	0.415805	0.0589505	0.0732276	0.508444	3.96953	4.47483	b.d.l.	b.d.l.	b.d.l.		Pages 45-55,
8.5_007	40.4442	b.d.l.	6.88151	0.21836	b.d.l.	b.d.l.	0.252165	1.88105	2.29496	b.d.l.	b.d.l.	0.354692	b.d.l.	52.2932		8.5_007	77.8694	b.d.l.	13.2493	0.42042	b.d.l.	b.d.l.	0.485507	3.62169	4.41861	b.d.l.	b.d.l.	b.d.l.		ISSN 1871-1014,
8.5_010	57.4754	0.263367	11.3016	1.18161	b.d.l.	0.33467	1.186	2.08667	3.56316	b.d.l.	b.d.l.	0.215264	b.d.l.	77.5462		8.5_010	74.324	0.340572	14.6146	1.52799	b.d.l.	0.432777	1.53367	2.69837	4.60768	b.d.l.	b.d.l.	b.d.l.		https://doi.org/10.1016/j.quageo.2016.09.008.
9-10_014	41.8365	0.825861	16.0089	5.57484	b.d.l.	1.62682	3.78537	1.90443	1.86853	0.316779	0.073612	0.2843	b.d.l.	74.0638		9-10_014	56.7047	1.11936	21.6983	7.55608	b.d.l.	2.20497	5.13065	2.58124	2.53259	0.429359	0.0997729	b.d.l.
9-10_017	67.6501	0.071324	13.8279	0.418273	b.d.l.	0.357917	0.170464	6.02741	1.31871	b.d.l.	0.088427	0.092751	b.d.l.	89.9817		9-10_017	75.2596	0.0793468	15.3833	0.465322	b.d.l.	0.398177	0.189638	6.7054	1.46704	b.d.l.	0.0983736	b.d.l.
9-10_021	52.2485	0.299739	9.41594	6.21153	0.128733	5.29982	1.14248	1.1194	1.61249	0.115761	b.d.l.	0.337534	0.158832	77.9477		9-10_021	67.3217	0.386211	12.1324	8.0035	0.165871	6.82877	1.47208	1.44234	2.07768	0.149157	b.d.l.	0.204654
13-3_011	46.6972	0.399002	10.5983	1.78013	b.d.l.	0.571344	1.77653	2.3022	2.88244	0.087232	0.072387	0.37254	0.22489	67.5854		13-3_011	69.4766	0.593639	15.7683	2.6485	b.d.l.	0.850051	2.64314	3.42524	4.28852	0.129785	0.107698	0.334594
14-1_003a	60.7178	1.21542	16.1577	4.54866	0.173921	1.42774	2.90296	2.79911	2.48712	0.272667	b.d.l.	0.092883	b.d.l.	92.7466		14-1_003a	65.532	1.31179	17.4388	4.90931	0.187711	1.54094	3.13313	3.02105	2.68432	0.294286	b.d.l.	b.d.l.
14-1_003b	64.32	1.19633	16.4333	5.04597	0.189562	1.47031	3.25576	2.37552	2.65899	0.312426	0.057632	0.083724	0.097649	97.4372		14-1_003b	66.0685	1.22885	16.88	5.18315	0.194715	1.51028	3.34427	2.4401	2.73127	0.320919	0.0591987	0.100304
14-1_006	40.996	0.916575	11.4712	4.09891	0.089552	1.61438	2.96713	2.26389	1.32118	0.403925	0.091341	0.254378	b.d.l.	66.515		14-1_006	61.8708	1.38329	17.3122	6.18604	0.135151	2.43641	4.47797	3.41664	1.99391	0.6096	0.137851	b.d.l.
14-1_010a	39.8602	0.826828	10.033	3.8096	0.115119	1.1394	2.10224	2.6075	1.63423	0.22842	b.d.l.	0.237494	0.15562	62.6305		14-1_010a	63.8857	1.32519	16.0803	6.10581	0.184506	1.82617	3.36935	4.17915	2.61925	0.366099	b.d.l.	0.249419
14-1_010b	59.828	1.15366	15.7063	3.98338	0.186766	1.35111	2.9037	4.37538	2.35534	0.370226	0.078394	0.093808	0.128775	92.4394		14-1_010b	64.787	1.24928	17.0082	4.31355	0.202247	1.4631	3.14438	4.73805	2.55057	0.400913	0.0848919	0.139449
14-1_010c	59.9564	1.13645	15.5484	4.36513	0.145622	1.64194	2.93078	2.49437	2.35153	0.309359	b.d.l.	0.113104	0.148944	91.0538		14-1_010c	65.9291	1.24966	17.0973	4.79998	0.160129	1.80551	3.22274	2.74285	2.58578	0.340177	b.d.l.	0.163781
14-1_011a	60.8384	1.2461	16.1924	4.91252	0.220185	1.34236	3.05894	3.80632	2.41066	0.352434	0.058065	0.150959	b.d.l.	94.5273		14-1_011a	64.4636	1.32035	17.1573	5.20525	0.233305	1.42235	3.24121	4.03313	2.55431	0.373435	0.061525	b.d.l.
14-1_011b	61.639	1.21741	15.8586	5.17185	0.148939	1.41665	3.15536	1.64142	2.41813	0.360736	0.079381	0.140451	b.d.l.	93.1973		14-1_011b	66.238	1.30824	17.0418	5.55773	0.160052	1.52235	3.39079	1.76389	2.59855	0.387651	0.0853038	b.d.l.
14-1_013a	64.5971	1.07786	16.2221	4.51416	0.16621	1.20362	2.60446	2.33942	2.75457	0.313082	b.d.l.	0.112014	b.d.l.	95.844		14-1_013a	67.4771	1.12591	16.9453	4.71542	0.17362	1.25728	2.72058	2.44372	2.87738	0.32704	b.d.l.	b.d.l.
14-1_013b	65.1299	1.07382	16.8202	4.42572	0.146899	1.4523	2.6891	0.991111	2.6586	0.302259	b.d.l.	0.111726	b.d.l.	95.7475		14-1_013b	68.102	1.12282	17.5878	4.62768	0.153603	1.51857	2.81181	1.03634	2.77992	0.316052	b.d.l.	b.d.l.
14-1_015	64.0662	1.22573	16.4266	5.05386	0.147808	1.56084	3.19247	3.60613	2.52394	0.352281	b.d.l.	0.115086	0.142347	98.3274		14-1_015	65.2324	1.24804	16.7256	5.14585	0.150498	1.58925	3.25058	3.67177	2.56988	0.358693	b.d.l.	0.144938
14-1_016a	50.9277	0.889418	13.3712	4.16786	0.120067	1.13594	2.63068	1.86872	2.02562	0.266438	b.d.l.	0.184375	b.d.l.	77.5244		14-1_016a	65.8491	1.15001	17.2888	5.38901	0.155246	1.46876	3.40145	2.41624	2.61911	0.344502	b.d.l.	b.d.l.
14-1_016b	46.2756	0.836251	11.8914	3.8833	0.137697	1.02244	2.35582	1.46875	1.72976	0.263863	0.050547	0.208616	b.d.l.	70.0594		14-1_016b	66.2492	1.1972	17.024	5.55942	0.19713	1.46375	3.37265	2.1027	2.47636	0.377752	0.0723642	b.d.l.
14-1_017a	61.7999	1.5241	16.1272	6.18856	0.180901	2.17552	4.47177	0.80417	2.22503	0.614565	0.119292	0.107587	b.d.l.	96.2861		14-1_017a	64.2554	1.58466	16.768	6.43445	0.188089	2.26196	4.64945	0.836122	2.31344	0.638984	0.124032	b.d.l.
14-1_017b	61.0108	1.56907	16.3525	6.43521	0.226023	2.34954	4.56487	1.87776	2.2913	0.57361	0.161707	0.106453	0.098801	97.552		14-1_017b	62.6101	1.6102	16.7812	6.6039	0.231948	2.41113	4.68453	1.92698	2.35136	0.588647	0.165946	0.101391
14-1_019	52.6959	0.958197	13.6598	4.22404	0.163953	1.26913	2.5925	2.09911	2.21769	0.340663	0.13105	0.192615	0.091687	80.5543		14-1_019b	65.5734	1.19236	16.9979	5.25629	0.204019	1.57927	3.22604	2.61208	2.75964	0.423912	0.163075	0.114093
14-1_021a	56.4259	1.16545	14.2847	4.48574	0.17094	1.37871	2.9168	2.41196	2.21902	0.32163	b.d.l.	0.172779	b.d.l.	85.8793		14-1_021	65.8362	1.35982	16.667	5.23384	0.199448	1.60864	3.40324	2.81421	2.58909	0.375269	b.d.l.	b.d.l.
14-1_021b	62.7753	1.19329	15.8099	4.88309	0.164939	1.58707	3.28798	1.65353	2.5131	0.404326	b.d.l.	0.135539	b.d.l.	94.357		14-1_021b	66.6253	1.26647	16.7795	5.18257	0.175055	1.6844	3.48963	1.75494	2.66723	0.429123	b.d.l.	b.d.l.
14-1_022a	59.2323	1.19397	15.201	4.65798	0.136403	1.52507	3.07749	2.82808	2.44521	0.50316	0.054394	0.128761	b.d.l.	90.9553		14-1_022a	65.2148	1.31456	16.7363	5.12844	0.15018	1.6791	3.38832	3.11372	2.69218	0.553979	0.0598878	b.d.l.
14-1_022b	59.0286	1.1698	15.4039	4.93083	0.237998	1.55278	3.06259	2.48179	2.38558	0.413113	b.d.l.	0.160995	0.12638	90.8648		14-1_022b	65.0784	1.28969	16.9826	5.43619	0.26239	1.71192	3.37647	2.73615	2.63008	0.455453	b.d.l.	0.139333
14-1_024a	51.7189	1.05876	13.5961	4.39138	0.151685	1.38879	2.75107	3.50279	2.16436	0.402196	b.d.l.	0.198129	b.d.l.	81.2607		14-1_024a	63.8012	1.3061	16.7723	5.41727	0.187121	1.71323	3.39376	4.32109	2.66999	0.496155	b.d.l.	b.d.l.
14-1_024b	43.3471	0.912684	11.3021	3.82748	0.158535	1.13898	2.32725	2.88485	1.7232	0.324116	b.d.l.	0.183395	0.10597	68.2103		14-1_024b	63.7206	1.34165	16.6142	5.62642	0.233048	1.67431	3.42107	4.24075	2.53312	0.476453	b.d.l.	0.155777
14-1_025b	56.2377	1.05021	14.6109	4.88681	0.163322	1.38892	2.91112	3.33347	2.23529	0.295578	0.074555	0.133585	0.112769	87.3566		14-1_025b	64.4758	1.20405	16.7512	5.60266	0.187246	1.59238	3.33756	3.82178	2.56273	0.338876	0.0854763	0.129288
16.4_014	59.3899	0.043976	10.6061	0.327695	0.073602	0.05481	0.370355	2.59269	3.37196	b.d.l.	0.066539	0.192053	b.d.l.	77.0178		16.4_014	77.3047	0.0572413	13.8054	0.426543	0.0958039	0.0713433	0.482072	3.37477	4.3891	b.d.l.	0.0866103	b.d.l.
16.4_024	55.4274	b.d.l.	12.1393	1.89925	b.d.l.	b.d.l.	0.519063	2.31035	3.28832	b.d.l.	b.d.l.	0.166031	b.d.l.	75.67		16.4_024	73.4099	b.d.l.	16.0777	2.51543	b.d.l.	b.d.l.	0.687465	3.05991	4.35516	b.d.l.	b.d.l.	b.d.l.
17.1_014	68.7683	0.115508	16.9954	0.653043	b.d.l.	0.300453	0.605114	2.09527	0.25645	b.d.l.	0.160171	0.062301	b.d.l.	89.9534		17.1_014	76.5018	0.128498	18.9067	0.726482	b.d.l.	0.334241	0.673163	2.3309	0.28529	b.d.l.	0.178183	b.d.l.
17-5_081	34.0455	0.077361	14.09	0.701666	b.d.l.	b.d.l.	0.989597	3.47224	2.17779	b.d.l.	0.061341	0.346591	b.d.l.	55.9133		17-5_081	61.2696	0.139222	25.3569	1.26275	b.d.l.	b.d.l.	1.78092	6.24878	3.91924	b.d.l.	0.110392	b.d.l.
17-9 _005	59.3134	1.04759	20.9536	5.24174	0.283432	1.03407	1.98183	8.20014	5.43403	0.275165	0.144919	0.183857	0.263847	104.205		17-9 _005	57.0205	1.00709	20.1436	5.03911	0.272475	0.994096	1.90522	7.88315	5.22397	0.264528	0.139317	0.253647
17-9 _008	59.5549	0.982209	20.2372	4.04244	0.128801	0.808275	1.01787	8.98993	5.18123	0.297491	b.d.l.	0.178466	0.249611	101.523		17-9 _008	58.7648	0.969178	19.9687	3.98881	0.127092	0.797551	1.00437	8.87066	5.11249	0.293544	b.d.l.	0.246299
17-9 _009	33.5887	0.577964	11.646	3.41554	0.114736	0.572303	1.05754	4.1417	3.38865	0.181408	0.080289	0.378754	0.254842	59.2056		17-9 _009	57.0975	0.982483	19.7971	5.80609	0.19504	0.972859	1.79772	7.04049	5.76038	0.308376	0.136483	0.433207
17-9 _010	55.8396	1.0025	19.166	5.15789	0.283869	0.833471	1.87306	7.49159	5.34659	0.307573	b.d.l.	0.179161	0.255733	97.5889		17-9 _010	57.3244	1.02916	19.6756	5.29504	0.291417	0.855634	1.92287	7.6908	5.48876	0.315752	b.d.l.	0.262533
17-9 _011	60.141	1.0382	21.4658	5.03132	0.325638	0.988194	1.87886	9.71271	5.44122	0.269556	0.076943	0.19623	0.25574	106.669		17-9 _011	56.4846	0.975081	20.1608	4.72543	0.30584	0.928115	1.76463	9.12221	5.11041	0.253168	0.0722651	0.240192
17-9 _013	47.4963	0.914522	16.8847	4.74366	0.275663	0.778323	1.55859	6.81858	4.3653	0.244319	b.d.l.	0.249059	0.229353	84.4056		17-9 _013	56.438	1.08669	20.0634	5.63671	0.32756	0.924851	1.85201	8.10226	5.18712	0.290315	b.d.l.	0.272531
17-9 _018	60.1993	0.944438	21.1137	5.28409	0.213229	1.00539	1.7581	8.97784	5.10892	0.189052	0.096362	0.158691	0.105551	105.074		17-9 _018	57.3787	0.900187	20.1244	5.03651	0.203238	0.958283	1.67573	8.55719	4.86955	0.180194	0.0918471	0.100606
17-9 _019	56.0244	1.05837	19.9071	5.15662	0.248539	0.869799	1.94088	8.41634	5.29273	0.282551	0.137802	0.214591	0.357743	99.7084		17-9 _019	56.3094	1.06375	20.0084	5.18286	0.249803	0.874224	1.95075	8.45916	5.31966	0.283989	0.138503	0.359563
17-9 _020	53.0386	0.857802	18.3509	4.44661	0.227264	0.770043	1.53867	8.03404	4.39442	0.201373	0.11355	0.235294	0.155038	92.2452		17-9 _020	57.6444	0.932293	19.9445	4.83275	0.246999	0.836913	1.67229	8.73171	4.77603	0.21886	0.123411	0.168501
17-9 _032	58.2139	1.06338	20.5652	5.30102	0.320297	0.87888	1.80613	8.43351	5.37096	0.235007	0.102458	0.187517	0.224917	102.566		17-9 _032	56.8614	1.03867	20.0874	5.17786	0.312855	0.85846	1.76417	8.23757	5.24617	0.229547	0.100078	0.219691
18-1_014	51.7328	2.9455	14.1619	11.167	0.155561	3.08878	7.72427	4.37992	3.72274	0.941615	b.d.l.	0.048532	0.085127	100.107		18-1_014	51.7026	2.94378	14.1536	11.1605	0.15547	3.08698	7.71976	4.37736	3.72057	0.941065	b.d.l.	0.0850773
18-5_004	42.4709	0.07548	13.3677	0.140264	b.d.l.	b.d.l.	1.1893	5.42354	2.58847	b.d.l.	b.d.l.	0.285342	b.d.l.	65.4998		18-5_004	65.125	0.115741	20.4981	0.215081	b.d.l.	b.d.l.	1.82368	8.31647	3.96917	b.d.l.	b.d.l.	b.d.l.
18-5_013	44.9017	0.239312	9.42635	1.08499	0.103687	0.236369	0.681358	2.51497	2.53885	b.d.l.	b.d.l.	0.439383	b.d.l.	62.1053		18-5_013	72.8145	0.388078	15.2862	1.75947	0.168143	0.383306	1.10492	4.07838	4.11711	b.d.l.	b.d.l.	b.d.l.
18-5_020	30.144	0.58487	10.3407	7.8611	1.34643	0.304313	2.42961	2.87456	0.31249	0.489818	0.136467	0.381885	b.d.l.	57.1644		18-5_020	53.0868	1.03002	18.2111	13.8442	2.37121	0.535928	4.2788	5.06241	0.550328	0.862622	0.240333	b.d.l.

## Sheet: Secondary Standards
Secondary standards
Date: 22-05-2023
SAMPLE	Si WT%	Ti WT%	Al WT%	Cr WT%	Fe WT%	Mn WT%	Mg WT%	Ca WT%	Na WT%	K WT%	P WT%	S WT%	Cl WT%	F WT%	O WT%	H WT%	TOTAL	SiO2	TiO2	Al2O3	Cr2O3	FeO	MnO	MgO	CaO	Na2O	K2O	P2O5	SO3	Cl	F	O	H2O	TOTAL	Si AT%	Ti AT%	Al AT%	Cr AT%	Fe AT%	Mn AT%	Mg AT%	Ca AT%	Na AT%	K AT%	P AT%	S AT%	Cl AT%	F AT%	O AT%
Rhyolitic glass VG-568, NMNH 72854 (H8)	35.7741	0.058412	6.31333	0.024144	0.719535	0.048501	0.019171	0.264856	2.6913	4.056	0.017028	0.002827	0.101932	0.211392	48.5693	0	98.8718	76.5336	0.097435	11.9289	0.035288	0.92568	0.062626	0.031791	0.370587	3.62781	4.88583	0.039018	0.007059	0.101932	0.211392	0.012806	0	98.8718	26.5274	0.025397	4.87304	0.00967	0.268329	0.018386	0.016427	0.137625	2.43803	2.1603	0.011449	0.001836	0.059879	0.231738	63.2205
Rhyolitic glass VG-568, NMNH 72854 (H8)	35.8503	0.034478	6.43894	-0.00649	0.712598	-0.00841	0.023907	0.285779	2.49497	4.0745	0.013477	-0.00818	0.095823	0.207918	48.6478	0	98.8574	76.6966	0.057511	12.1663	-0.00949	0.916755	-0.01086	0.039645	0.399862	3.36316	4.90811	0.030881	-0.02044	0.095823	0.207918	0.015652	0	98.8574	26.5736	0.014985	4.96807	-0.0026	0.265639	-0.00319	0.020477	0.148439	2.2593	2.16931	0.009058	-0.00531	0.056268	0.227841	63.2981
Rhyolitic glass VG-568, NMNH 72854 (H8)	35.89	0.045296	6.55383	0.018619	0.885676	-0.01461	0.016426	0.320977	2.79863	4.08983	-0.005	0.015725	0.136593	0.144632	49.0091	0	99.9057	76.7815	0.075557	12.3833	0.027213	1.13942	-0.01887	0.027239	0.449111	3.77249	4.92658	-0.01147	0.039267	0.136593	0.144632	0.0331	0	99.9057	26.3611	0.019508	5.01073	0.007387	0.327156	-0.00549	0.013941	0.165206	2.51123	2.15768	-0.00333	0.010117	0.079479	0.157049	63.1883
Average	35.8381	0.046062	6.43537	0.012091	0.772603	0.00849367	0.0198347	0.290537	2.66163	4.07344	0.00850167	0.00345733	0.111449	0.187981	48.7421	0	99.2116
Stdev	0.0589001	0.0119854	0.12029	0.016327	0.0979855	0.0347858	0.0037844	0.0283615	0.153988	0.0169397	0.0118268	0.011965	0.0219882	0.0375812	0.234565	0	0.601122
Literature	35.86	0.072	6.38		0.96	0.023		0.36	2.78	4.06
Rhyolitic glass VG-568, NMNH 72854 (H8)	35.75	0.047745	6.37158	0.024641	0.866672	0.034334	-0.00484	0.303281	2.77633	4.11234	0.011182	0.002235	0.081364	0.201067	48.666	0	99.244	76.4821	0.079641	12.039	0.036015	1.11497	0.044334	-0.00802	0.424351	3.74243	4.95369	0.025624	0.00558	0.081364	0.201067	0.02179	0	99.244	26.4364	0.020702	4.90443	0.009843	0.322308	0.01298	-0.00413	0.157157	2.50812	2.18427	0.007498	0.001447	0.047665	0.21981	63.1715
Rhyolitic glass VG-568, NMNH 72854 (H8)	35.9273	0.067314	6.39025	0.00521	0.866033	0.022722	0.012918	0.322972	2.84244	4.06967	0.021407	0.006558	0.080415	0.241995	48.9215	0	99.7987	76.8613	0.112284	12.0743	0.007614	1.11415	0.02934	0.021422	0.451902	3.83154	4.9023	0.049051	0.016376	0.080415	0.241995	0.004772	0	99.7987	26.4118	0.029016	4.88997	0.002069	0.320183	0.00854	0.010974	0.166379	2.55279	2.14894	0.01427	0.004223	0.046833	0.263004	63.1311
Rhyolitic glass VG-568, NMNH 72854 (H8)	35.9188	0.050282	6.43544	-0.00132	0.902612	0.04999	0.011065	0.294194	3.06254	4.0257	-0.01816	0.003743	0.11388	0.250554	48.9445	0	100.044	76.8432	0.083873	12.1597	-0.00193	1.16121	0.064549	0.018349	0.411636	4.12824	4.84933	-0.04161	0.009346	0.11388	0.250554	-0.00639	0	100.044	26.3448	0.021624	4.91323	-0.00052	0.332939	0.018745	0.009378	0.151206	2.74414	2.12083	-0.01208	0.002405	0.06617	0.271679	63.0155
Average	35.8654	0.0551137	6.39909	0.00951033	0.878439	0.035682	0.006381	0.306816	2.89377	4.06924	0.00480967	0.00417867	0.0918863	0.231205	48.844	0	99.6956
Stdev	0.100001	0.0106417	0.032835	0.0135042	0.0209369	0.0136839	0.00976174	0.014711	0.14985	0.0433216	0.0205388	0.00219418	0.019053	0.0264491	0.154581	0	0.40985
Literature	35.86	0.072	6.38		0.96	0.023		0.36	2.78	4.06
Rhyolitic glass VG-568, NMNH 72854 (H8)	36.0906	0.04442	6.54759	0.024451	0.786364	0.006271	0.040437	0.296557	2.43076	3.98944	0.01872	0.009502	0.099515	0.246579	49.0561	0	99.6873	77.2107	0.074094	12.3716	0.035737	1.01166	0.008098	0.067057	0.414942	3.27661	4.80566	0.042896	0.023726	0.099515	0.246579	-0.00147	0	99.6873	26.5344	0.019149	5.01087	0.00971	0.290757	0.002357	0.034355	0.152787	2.18328	2.10678	0.01248	0.006119	0.057962	0.268012	63.311
Rhyolitic glass VG-568, NMNH 72854 (H8)	35.6819	0.059199	6.3122	0.018497	0.811297	0.027324	0.019294	0.2967	2.5772	4.05837	-0.00171	-0.00549	0.095377	0.22257	48.4149	0	98.5876	76.3363	0.098747	11.9268	0.027035	1.04373	0.035281	0.031995	0.415143	3.474	4.88868	-0.00393	-0.01372	0.095377	0.22257	0.00959	0	98.5876	26.5496	0.025827	4.88884	0.007434	0.303584	0.010394	0.016589	0.1547	2.34265	2.16896	-0.00116	-0.00358	0.05622	0.244827	63.2352
Rhyolitic glass VG-568, NMNH 72854 (H8)	35.7243	0.057332	6.42855	0.019477	0.800765	0.040938	0.002337	0.300671	2.69958	4.08193	-0.00487	-0.00406	0.120751	0.224165	48.5963	0	99.0882	76.427	0.095634	12.1466	0.028468	1.03018	0.052861	0.003875	0.4207	3.63898	4.91707	-0.01115	-0.01013	0.120751	0.224165	0.003185	0	99.0882	26.4525	0.024892	4.95486	0.00779	0.298193	0.015497	0.001999	0.156012	2.44203	2.171	-0.00327	-0.00263	0.070832	0.245388	63.165
Average	35.8323	0.0536503	6.42945	0.0208083	0.799475	0.0248443	0.0206893	0.297976	2.56918	4.04325	0.00404667	-1.6e-05	0.105214	0.231105	48.6891	0	99.121
Stdev	0.224725	0.00804803	0.117698	0.00319247	0.0125164	0.017466	0.0190883	0.00233503	0.134589	0.0480639	0.0128053	0.00827378	0.0136133	0.0134249	0.33052	0	0.550585
Literature	35.86	0.072	6.38		0.96	0.023		0.36	2.78	4.06
Rhyolitic glass VG-568, NMNH 72854 (H8)	35.7833	0.047479	6.44434	-0.01784	0.787204	-0.03556	0.03122	0.310005	3.10159	3.98659	-0.00067	0.012457	0.121671	0.186531	48.8166	0	99.575	76.5534	0.079198	12.1765	-0.02608	1.01274	-0.04591	0.051773	0.43376	4.18087	4.80221	-0.00154	0.031106	0.121671	0.186531	0.018806	0	99.575	26.337	0.02049	4.93719	-0.00709	0.291382	-0.01338	0.026553	0.159889	2.78882	2.10755	-0.00045	0.008031	0.070943	0.202964	63.0701
Rhyolitic glass VG-568, NMNH 72854 (H8)	35.83	0.056928	6.23563	-0.00727	0.813118	0.0224	0.016831	0.311076	2.64767	3.97322	0.004291	0.003773	0.101413	0.18356	48.5491	0	98.7417	76.6532	0.09496	11.7821	-0.01063	1.04607	0.028924	0.02791	0.435258	3.569	4.78611	0.009833	0.00942	0.101413	0.18356	0.024643	0	98.7417	26.6043	0.024785	4.8195	-0.00292	0.303633	0.008503	0.014441	0.161858	2.40171	2.11904	0.002889	0.002454	0.059654	0.201496	63.2786
Rhyolitic glass VG-568, NMNH 72854 (H8)	35.9551	0.042214	6.47517	-0.02635	0.855842	-0.0041	0.009474	0.278711	2.91104	4.08881	0.014475	0.003359	0.089423	0.204238	48.9947	0	99.8921	76.9209	0.070416	12.2347	-0.03852	1.10104	-0.00529	0.01571	0.389972	3.92402	4.92536	0.033168	0.008388	0.089423	0.204238	0.018639	0	99.8921	26.3936	0.01817	4.94772	-0.01045	0.315953	-0.00154	0.008036	0.143369	2.61059	2.15589	0.009635	0.00216	0.052002	0.221644	63.1332
Average	35.8561	0.0488737	6.38505	-0.0171533	0.818721	-0.00575333	0.019175	0.299931	2.88677	4.01621	0.006032	0.00652967	0.104169	0.191443	48.7868	0	99.4029
Stdev	0.0888314	0.00745549	0.130314	0.00955852	0.0346604	0.0290153	0.0110609	0.0183846	0.227931	0.0632307	0.00772114	0.00513739	0.0162997	0.0111799	0.22429	0	0.594189
Literature	35.86	0.072	6.38		0.96	0.023		0.36	2.78	4.06
Rhyolitic glass VG-568, NMNH 72854 (H8)	35.7937	0.040363	6.45472	0.02965	0.833593	0.057572	0.031511	0.300999	2.8085	4.08375	-0.00241	-0.01366	0.108656	0.186709	48.7712	0	99.4848	76.5755	0.067327	12.1961	0.043336	1.07242	0.074339	0.052254	0.421158	3.78579	4.91925	-0.00553	-0.03412	0.108656	0.186709	0.021687	0	99.4848	26.4019	0.017457	4.9559	0.011813	0.309224	0.02171	0.026859	0.155581	2.53078	2.16361	-0.00162	-0.00883	0.063492	0.203599	63.1485
Rhyolitic glass VG-568, NMNH 72854 (H8)	35.85	0.069834	6.35944	0.000585	0.87831	-0.00421	0.033096	0.285034	2.94535	4.19302	0.014957	0.017331	0.102428	0.230489	48.8681	0	99.8438	76.6959	0.116487	12.016	0.000855	1.12994	-0.00543	0.054883	0.39882	3.97027	5.05089	0.034273	0.043274	0.102428	0.230489	0.004658	0	99.8438	26.3543	0.030101	4.86628	0.000232	0.324713	-0.00158	0.028114	0.146832	2.64515	2.21401	0.00997	0.01116	0.059651	0.250493	63.0606
Rhyolitic glass VG-568, NMNH 72854 (H8)	35.9687	0.043427	6.50455	-0.04309	0.892783	0.01958	0.009322	0.296861	2.90194	4.17878	0.000866	-0.00424	0.113887	0.233358	49.0226	0	100.139	76.95	0.072439	12.2902	-0.06298	1.14856	0.025282	0.015459	0.415369	3.91175	5.03373	0.001985	-0.01059	0.113887	0.233358	0.000858	0	100.139	26.3601	0.018661	4.96198	-0.01706	0.329047	0.007336	0.007894	0.152454	2.59813	2.1997	0.000576	-0.00272	0.06612	0.252829	63.065
Average	35.8708	0.051208	6.43957	-0.004285	0.868229	0.024314	0.024643	0.294298	2.88526	4.15185	0.004471	-0.000189667	0.108324	0.216852	48.8873	0	99.8225
Stdev	0.0893349	0.0162032	0.0737317	0.0366137	0.0308559	0.0311619	0.013292	0.00828535	0.0699326	0.0594046	0.00922769	0.0158876	0.00573672	0.026144	0.126795	0	0.327618
Literature	35.86	0.072	6.38		0.96	0.023		0.36	2.78	4.06
Date: 05-03-2024
SAMPLE
Rhyolitic glass VG-568, NMNH 72854 (H8)	36.1222	0.072405	6.49534	-0.02812	0.879261	0.022639	0.016355	0.302808	2.82833	3.96703	0.006209	0.018833	0.128866	0.275651	49.1709	0	100.279	77.2784	0.120776	12.2728	-0.04109	1.13117	0.029232	0.027122	0.423689	3.81252	4.77866	0.014228	0.047027	0.128866	0.275651	-0.02033	0	100.279	26.4157	0.031046	4.94431	-0.01111	0.323367	0.008464	0.013821	0.155173	2.52679	2.08374	0.004117	0.012064	0.074656	0.29801	63.1198
Rhyolitic glass VG-568, NMNH 72854 (H8)	35.6012	0.045761	6.5095	-0.00671	1.13805	0.021102	0.038866	0.29799	2.73994	4.04007	-0.00029	-0.0052	0.090415	0.215944	48.6421	0	99.3687	76.1637	0.076332	12.2996	-0.00981	1.46409	0.027248	0.064451	0.416947	3.69338	4.86663	-0.00066	-0.013	0.090415	0.215944	0.013489	0	99.3687	26.3211	0.019838	5.00959	-0.00268	0.423145	0.007976	0.033205	0.154384	2.47475	2.14545	-0.00019	-0.00337	0.052956	0.236028	63.1279
Rhyolitic glass VG-568, NMNH 72854 (H8)	35.9577	0.039568	6.42772	0.006946	0.924832	0.010812	0.042588	0.302317	3.02392	4.04218	-0.00311	0.000375	0.1188	0.222402	49.0127	0	100.13	76.9264	0.066001	12.1451	0.010152	1.18979	0.013961	0.070623	0.423003	4.07618	4.86919	-0.00712	0.000937	0.1188	0.222402	0.004364	0	100.13	26.3502	0.017001	4.90303	0.002749	0.340836	0.004051	0.036064	0.155245	2.70716	2.12765	-0.00206	0.000241	0.068968	0.240943	63.0479
Average	35.8937	0.052578	6.47752	-0.00929467	0.980714	0.0181843	0.032603	0.301038	2.86406	4.01643	0.000936333	0.00466933	0.112694	0.237999	48.9419	0	99.9259
Stdev	0.266331	0.0174477	0.0437053	0.0176753	0.138149	0.00643071	0.0141937	0.00265132	0.145323	0.0427918	0.004779	0.0125788	0.0199395	0.0327671	0.271416	0	0.488266
Literature	35.86	0.072	6.38		0.96	0.023		0.36	2.78	4.06
Rhyolitic glass VG-568, NMNH 72854 (H8)	36.0502	0.064412	6.60387	-0.00599	0.761156	0.022898	-0.00111	0.2943	2.51659	4.02214	0.004801	-0.00316	0.102394	0.21181	49.0425	0	99.6868	77.1243	0.107443	12.4779	-0.00875	0.979225	0.029567	-0.00184	0.411786	3.39231	4.84505	0.011001	-0.0079	0.102394	0.21181	0.012531	0	99.6868	26.5064	0.027769	5.05426	-0.00238	0.281454	0.008607	-0.00094	0.151634	2.26052	2.12418	0.003201	-0.00204	0.059642	0.230235	63.2974
Rhyolitic glass VG-568, NMNH 72854 (H8)	35.4743	0.038985	6.55959	-0.01139	0.91277	0.089894	-0.00493	0.295502	2.64096	4.04865	-0.01575	-0.00882	0.089151	0.191949	48.4134	0	98.7143	75.8922	0.06503	12.3942	-0.01665	1.17428	0.116075	-0.00817	0.413466	3.55995	4.87697	-0.03609	-0.02202	0.089151	0.191949	0.023876	0	98.7143	26.3797	0.016998	5.07748	-0.00457	0.341356	0.034175	-0.00423	0.153985	2.39921	2.1625	-0.01062	-0.00574	0.052519	0.21102	63.1963
Rhyolitic glass VG-568, NMNH 72854 (H8)	36.1347	0.048389	6.67967	0.001328	0.759314	0.023851	0.012119	0.299723	3.00884	4.00444	-0.00298	0.016405	0.077402	0.239767	49.3902	0	100.693	77.305	0.080716	12.6211	0.00194	0.976855	0.030797	0.020096	0.419372	4.05585	4.82372	-0.00682	0.040964	0.077402	0.239767	0.006397	0	100.693	26.2965	0.020648	5.05992	0.000522	0.277897	0.008873	0.010191	0.152846	2.675	2.09318	-0.00196	0.010458	0.044623	0.257956	63.0934
Average	35.8864	0.0505953	6.61438	-0.00535067	0.81108	0.0455477	0.00202633	0.296508	2.72213	4.02508	-0.004643	0.001475	0.089649	0.214509	48.9487	0	99.698
Stdev	0.359381	0.0128563	0.0607256	0.00638306	0.0880709	0.038408	0.00894676	0.00284812	0.255967	0.0222508	0.0103759	0.0132358	0.0125034	0.024023	0.495109	0	0.989398
Literature	35.86	0.072	6.38		0.96	0.023		0.36	2.78	4.06
Rhyolitic glass VG-568, NMNH 72854 (H8)	36.0096	0.054851	6.62981	0.008035	1.01586	0.027934	0.026884	0.313239	2.76622	3.96575	-0.01193	0.000188	0.096172	0.185535	49.191	0	100.279	77.0375	0.091495	12.5269	0.011744	1.3069	0.036069	0.044582	0.438284	3.7288	4.77712	-0.02733	0.000469	0.096172	0.185535	0.02499	0	100.279	26.3538	0.023538	5.05058	0.003176	0.373894	0.010451	0.022736	0.160643	2.47321	2.08469	-0.00792	0.00012	0.055759	0.200739	63.1946
Rhyolitic glass VG-568, NMNH 72854 (H8)	35.8291	0.038017	6.49447	0.035952	0.965517	0.025615	0.044454	0.323295	2.86282	4.02081	-0.00308	0.005165	0.091553	0.214574	48.9196	0	99.8679	76.6512	0.063414	12.2712	0.052547	1.24213	0.033076	0.073718	0.452355	3.85901	4.84344	-0.00705	0.012898	0.091553	0.214574	0.013809	0	99.8679	26.3339	0.016384	4.96866	0.014273	0.356886	0.009625	0.037756	0.16651	2.57054	2.12268	-0.00205	0.003326	0.053307	0.233152	63.115
Rhyolitic glass VG-568, NMNH 72854 (H8)	35.7769	0.047365	6.27071	0.011861	0.779738	0.009433	0.05556	0.30335	2.56895	4.02428	0.012967	0.008142	0.090094	0.189307	48.5323	0	98.681	76.5397	0.079007	11.8484	0.017336	1.00313	0.01218	0.092135	0.424448	3.46289	4.84762	0.029712	0.02033	0.090094	0.189307	0.024776	0	98.681	26.5795	0.020633	4.84926	0.00476	0.291328	0.003583	0.047698	0.157925	2.33158	2.14745	0.008735	0.005298	0.053024	0.207918	63.2913
Average	35.8719	0.0467443	6.465	0.018616	0.920372	0.020994	0.0422993	0.313295	2.73266	4.00361	-0.000681	0.00449833	0.0926063	0.196472	48.881	0	99.6093
Stdev	0.122103	0.00843415	0.181355	0.0151348	0.124366	0.010079	0.0144589	0.00997262	0.149781	0.0328365	0.0126207	0.00401869	0.00317296	0.0157898	0.331045	0	0.829793
Literature	35.86	0.072	6.38		0.96	0.023		0.36	2.78	4.06
Date: 09-04-2024
SAMPLE
Rhyolitic glass VG-568, NMNH 72854 (H8)	35.8047	0.055084	6.31122	-0.00706	0.822496	0.032787	0.036737	0.321661	2.51142	4.04851	0.020412	-0.03033	0.095809	0.199652	48.5417	0	98.7649	76.5991	0.091883	11.9249	-0.01033	1.05814	0.042336	0.060922	0.450069	3.38534	4.87681	0.046773	-0.07574	0.095809	0.199652	0.019135	0	98.7649	26.5912	0.023987	4.87895	-0.00283	0.3072	0.012449	0.031528	0.167401	2.2786	2.15965	0.013746	-0.01973	0.056369	0.219207	63.2823
Rhyolitic glass VG-568, NMNH 72854 (H8)	35.7626	0.042948	6.43386	-0.00647	0.790536	0.03642	0.003563	0.30352	2.77954	4.01213	-0.00884	0.002537	0.08009	0.246435	48.639	0	99.1178	76.509	0.07164	12.1567	-0.00946	1.01702	0.047027	0.005908	0.424686	3.74676	4.83299	-0.02025	0.006336	0.08009	0.246435	0.002975	0	99.1178	26.4529	0.018627	4.95372	-0.00259	0.294074	0.013772	0.003045	0.157324	2.51171	2.13162	-0.00593	0.001644	0.046931	0.269481	63.1537
Rhyolitic glass VG-568, NMNH 72854 (H8)	35.9429	0.035462	6.3557	0.008803	0.886826	0.042754	0.005567	0.31824	2.82425	4.07527	0.005144	0.003096	0.10272	0.238159	48.8593	0	99.7042	76.8948	0.059152	12.009	0.012867	1.1409	0.055206	0.009232	0.445281	3.80703	4.90904	0.011787	0.007731	0.10272	0.238159	0.001366	0	99.7042	26.4547	0.015304	4.86931	0.0035	0.328259	0.016087	0.004735	0.164136	2.53947	2.15445	0.003433	0.001996	0.059893	0.259142	63.1256
Average	35.8367	0.044498	6.36693	-0.00157567	0.833286	0.0373203	0.015289	0.314474	2.70507	4.0453	0.005572	-0.00823233	0.092873	0.228082	48.68	0	99.1956
Stdev	0.0943219	0.0099024	0.062086	0.00899303	0.0490434	0.00504413	0.0186015	0.00963913	0.169189	0.0316919	0.0146307	0.0191392	0.0115972	0.0249664	0.162721	0	0.474462
Literature	35.86	0.07	6.38		0.96	0.02		0.36	2.78	4.06
Rhyolitic glass VG-568, NMNH 72854 (H8)	35.9995	0.071	6.40639	0.02878	0.828651	0.015105	-0.0157	0.326478	2.89665	4.05774	-0.007	-0.00344	0.113788	0.189944	48.9803	0	99.8882	77.0158	0.118432	12.1048	0.042064	1.06606	0.019504	-0.02603	0.456808	3.90461	4.88793	-0.01603	-0.00858	0.113788	0.189944	0.019165	0	99.8882	26.4403	0.030576	4.89777	0.011418	0.306077	0.005672	-0.01332	0.168029	2.59906	2.14065	-0.00466	-0.00221	0.066207	0.206242	63.1482
Rhyolitic glass VG-568, NMNH 72854 (H8)	35.7009	0.045615	6.53533	0.000679	0.734866	0.000106	0.038281	0.289339	2.50067	3.99225	-0.00532	-0.01129	0.086821	0.181061	48.5634	0	98.6527	76.377	0.076089	12.3484	0.000992	0.945403	0.000137	0.063481	0.404843	3.37084	4.80904	-0.01218	-0.02819	0.086821	0.181061	0.028988	0	98.6527	26.5161	0.019865	5.05259	0.000272	0.274492	4e-05	0.032856	0.150591	2.26901	2.1298	-0.00358	-0.00734	0.051085	0.19881	63.3154
Rhyolitic glass VG-568, NMNH 72854 (H8)	35.9393	0.036456	6.61238	-0.01798	0.823656	0.016589	0.021103	0.282665	3.17247	4.01727	-0.01484	0.00161	0.118748	0.220344	49.1272	0	100.357	76.8869	0.06081	12.494	-0.02627	1.05963	0.02142	0.034996	0.395505	4.27641	4.83917	-0.03401	0.00402	0.118748	0.220344	0.005249	0	100.357	26.2551	0.015616	5.02827	-0.00709	0.302609	0.006196	0.017815	0.144704	2.83135	2.10798	-0.00983	0.00103	0.068724	0.237974	62.9995
Average	35.8799	0.0510237	6.51803	0.00382633	0.795724	0.0106	0.0145613	0.299494	2.8566	4.02242	-0.00905333	-0.00437333	0.106452	0.197116	48.8903	0	99.6326
Stdev	0.157914	0.0178959	0.104079	0.0235383	0.052764	0.00911831	0.0275787	0.0236059	0.337686	0.0330473	0.00508131	0.00650045	0.0171812	0.0206002	0.292477	0	0.880423
Literature	35.86	0.07	6.38		0.96	0.02		0.36	2.78	4.06
[truncated: 49 more columns]
